# Supplementary material for: “I am Wolf, I Rule!” - Attributing Intentions to Animals in Human-Wildlife Interactions
Source: Frontiers journal article supplement (doi:10.3389/fcosc.2022.803074), 2022-03-10
Supplement: Data_Sheet_1.doc [file Data_Sheet_1.doc]

# “I am Wolf, I rule!” - Attributing Intentions to Animals in Human-Wildlife Interactions

Uta Maria Jürgens

**Appendix 1**

Demographic details of participants

| Code | Stakeholder Group | | | | | | | | Natio-nality | Gender | Age | Living close to model wildlife | Attitude to model wildlife |
| --- | --- | --- | --- | --- | --- | --- | --- | --- | --- | --- | --- | --- | --- |
| H | L | Animals owned | P | L | E | A | S |
| W1 |  |  |  |  | L |  | A | S | G | M | 59 | No wolf area, urban | positive |
| W2 | H |  |  |  |  |  |  |  | G | M | 73 | Dispersing wolves | ambivalent |
| W3 | H |  |  |  |  |  |  |  | G | M | 70 | Dispersing wolves | ambivalent |
| W4 | H |  |  |  |  |  |  |  | G | M | 73 | Dispersing wolves | negative |
| W5 | H |  |  |  |  |  |  |  | G | M | 70 | Dispersing wolves | neutral |
| W6 |  | F | Horses |  |  | E |  |  | G | M | 83 | Wolf area | negative |
| W7 | H |  |  | P | L |  |  |  | G | M | 50+ | Wolf area | ambivalent |
| C1 |  |  |  |  |  | E |  | S | CH | F | 33 | No corvid populations nearby | neutral |
| C2 | H |  |  |  |  |  |  |  | G | M | 43 | Close to rookery | positive |
| C3 | H |  |  |  | L |  |  |  | G | M | 47 | Raven and crow populations adjacent | positive |
| C4 |  | F | Sheep |  |  | E |  |  | G | F | 60 | Raven and crow populations adjacent | ambivalent |
| C5 |  |  |  |  |  |  | A |  | G | F | 59 | Close to rookery | positive |
| C6 |  |  |  |  |  |  |  |  | G | M+F | 70 | Close to rookery | negative |
| S1 |  |  |  |  |  |  | A |  | G | M | 27 | n.a. | Negative - phobic |
| S2 |  |  |  |  |  |  | A |  | G | F | 33 | n.a. | neutral |
| S3 |  |  | Pet spiders |  |  |  |  |  | G | M | 27 | n.a. | positive |
| S4 |  |  |  |  |  |  |  |  | G | F | 29 | n.a. | Negative - phobic |
| S5 |  |  | Pet spiders |  |  |  |  |  | G | M | 30 | n.a. | positive |
| S6 |  |  |  |  |  |  | A |  | G | M | 30 | n.a. | ambivalent |
| S7 |  |  | Pet spiders |  |  |  |  | S | G | M | 36 | n.a. | positive |
| **total** | **7** | **2** | **-** | **1** | **3** | **3** | **5** | **3** | **19 G**  **1 CH** | **14 M**  **5 F**  **1 Couple** | **Md: 47**  **Mn: 50** | **-** | **-** |
| H: Hunter; F: livestock Farmer; P: (former) Politician; L: political lobbyist for their respective cause; E: active Environmentalist; A: Animal welfare / rights activist; S: Scientist  G: German, CH: Swiss  M: male; F: Female  Md: Median; Mn: Mean  n.a.: not applicable | | | | | | | | | | | | | |

**Appendix 2**

Questions and prompts used in the in depth interviews.

1. Have you had any personal experiences with wolves/crows/spiders?

2. Which feelings arise when you think about wolves/crows/spiders?

3. What is it about wolves/crows/spiders that evokes these thoughts and feelings?

4. (Arrangement of figures:) How would you describe your personal relation to wolves/crows/spiders? Can you illustrate your relation to wolves/crows/spiders with these figures?

5. Could wolves/crows/spiders stand as symbols for something? If so, for what?

6. Other people might see wolves/crows/spiders in a different light. What distinguishes you from these people? Why do you like/dislike wolves/crows/spiders while others dislike/like them?

7. (Arrangement of figures:) How do you think would these people that like/dislike wolves/crows/spiders arrange these figures to depict their view of wolves/crows/spiders?

8. There are many different opinions about whether humans should restrict their freedom in order to be considerate of wildlife. What do you think?

9. What enrages you about other people’s behavior towards wolves/crows/spiders?

10. How would you explain to a child what is key in human-wolf/crow/spider relations?

11. If you were granted three wishes with regard to wolves/crows/spiders – what would they be?

12. Imagine you were a god/goddess who could arrange the world in any possible way. You could change and create everything: Humans, animals, landscapes – just everything. How would you arrange the world in a way that human-wildlife conflicts are eliminated?

13. Ideally, what ought to be the role of humans in nature?

14. What constitutes the biggest challenge in human coexistence with wolves/crows/spiders?

15. What is the biggest possibility inherent in human coexistence with wolves/crows/spiders?

16. If you had the power to decide: What would be a realistic solution to the conflict between humans and wolves/crows/spiders?
